# Supplementary material
Source: ML conference proceedings conference paper supplement (https://openreview.net/forum?id=HYiR6tGQPv)

# Equiformer: Equivariant Graph Attention Transformer for 3D Atomistic Graphs

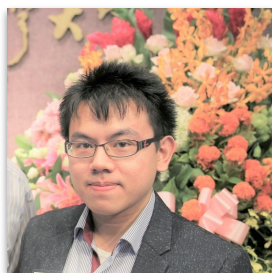

Yi-Lun Liao

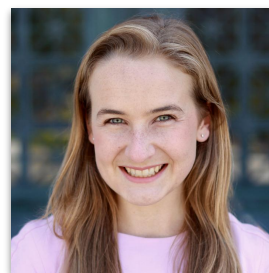

Tess Smidt

Atomic Architects  
Massachusetts Institute of Technology

<https://github.com/atomicarchitects/equiformer>

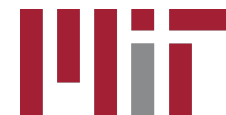

- Introduction
- Equiformer
  - Equivariant Features and Operations
  - Equivariant Graph Attention
  - Overall Architecture
- Experiments
- Conclusion

- Introduction
- Equiformer
  - Equivariant Features and Operations
  - Equivariant Graph Attention
  - Overall Architecture
- Experiments
- Conclusion

# Introduction

- Incorporating equivariance/invariance to  $E(3)$  transformations is important to learning representations of 3D atomistic systems.

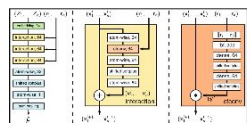

SchNet

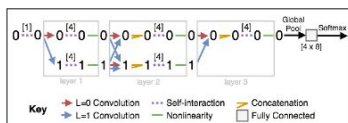Tensor Field  
Network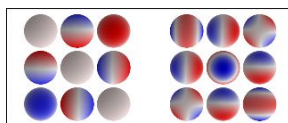3D Steerable  
CNN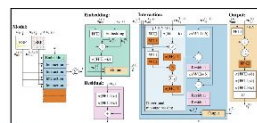

DimeNet

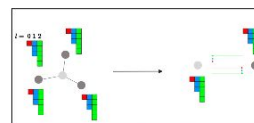

NequIP

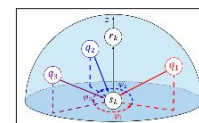

SphereNet

# Introduction

- A parallel line of research lies in applying Transformers to different domains and has demonstrated widespread success.

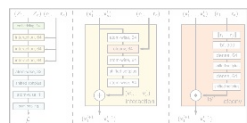

SchNet

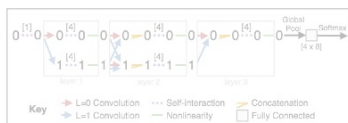Tensor Field  
Network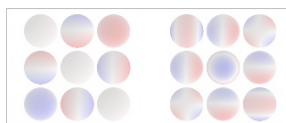3D Steerable  
CNN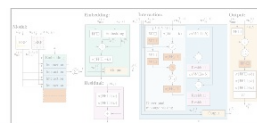

DimeNet

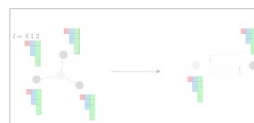

NequIP

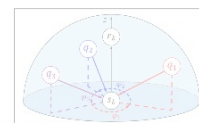

SphereNet

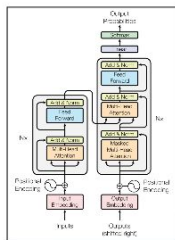

Transformer

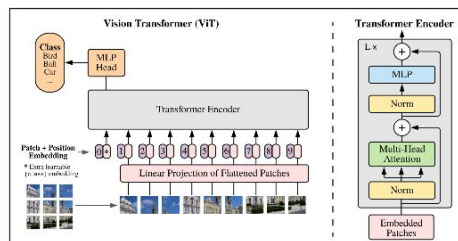

Vision Transformer

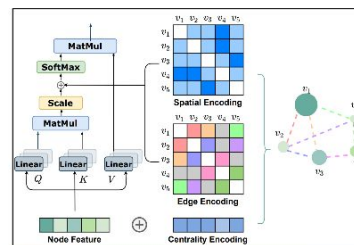

Graphormer

# Introduction

- We present **Equiformer**, an equivariant graph neural network combining the inductive bias of **equivariance** with the strength of **Transformer**.

Equivariant Networks

Transformer

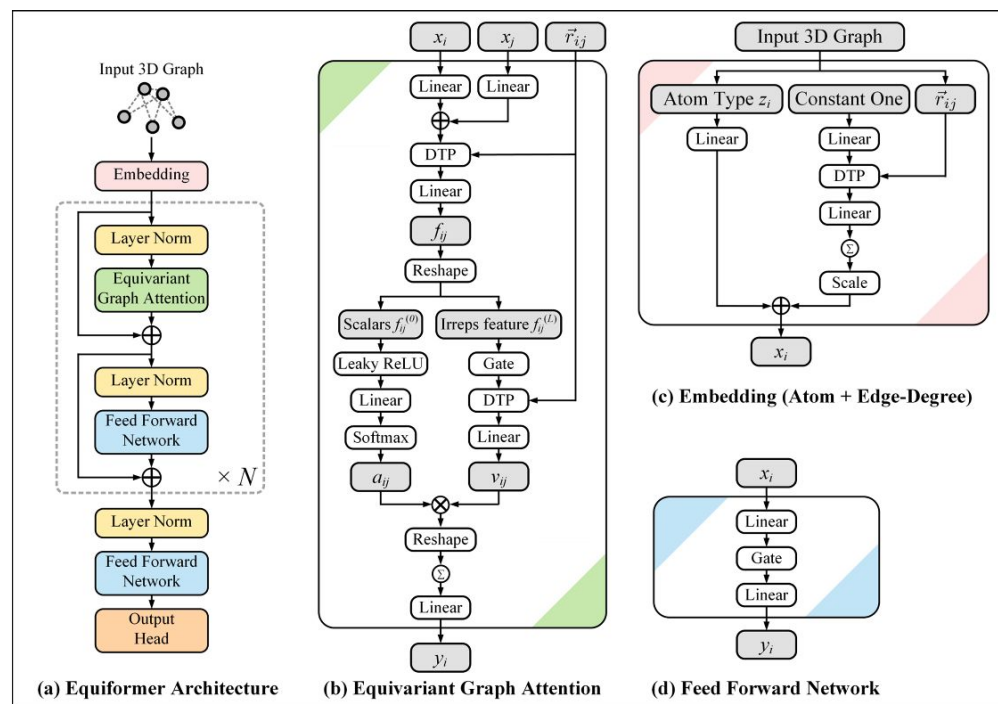

Equiformer

- Introduction
- Equiformer
  - Equivariant Features and Operations
  - Equivariant Graph Attention
  - Overall Architecture
- Experiments
- Conclusion

# Equiformer – Equivariant Irreps Features

- To incorporate 3D-related inductive biases (e.g., rotational equivariance), we use vector spaces of irreducible representations (irreps) as internal feature representations.
- Irreps features contain vectors of different types (degrees)  $L$ .

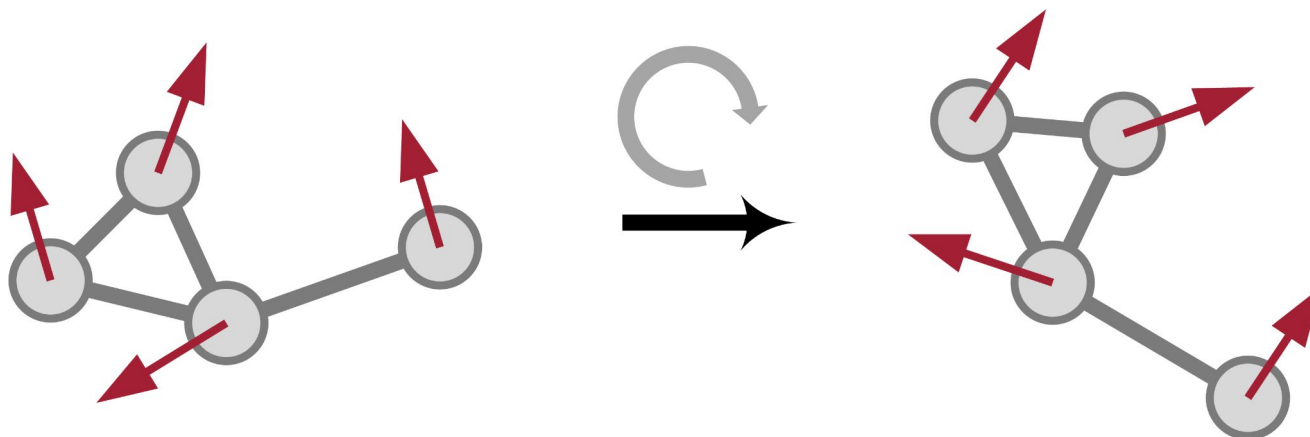

Equivariant features (e.g., type-1 vectors) are rotated accordingly when input graphs are rotated.



# Equiformer – Equivariant Operations

- To operate on equivariant irreps features, we:
  - replace original operations in Transformers with their equivariant counterparts and
  - use additional tensor product operations.

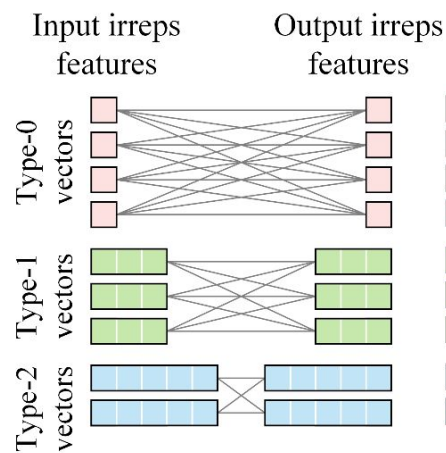

(a) Linear

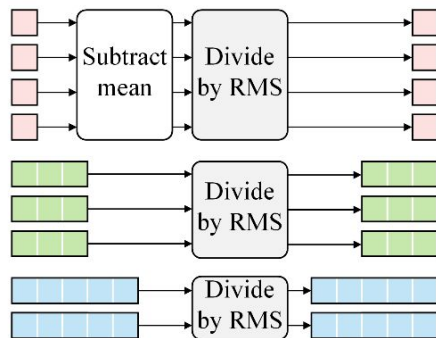

(b) Layer Normalization

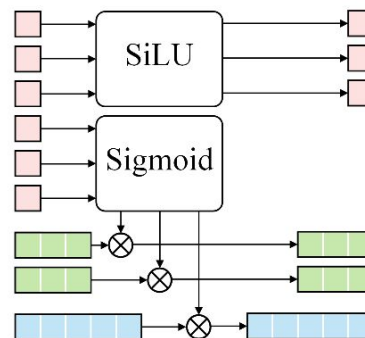

(c) Gate

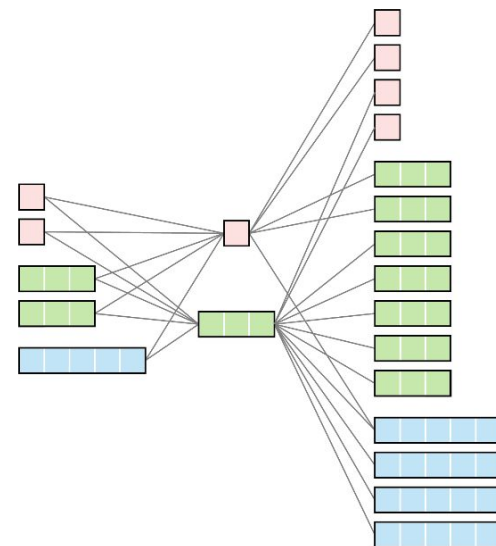

(d) Tensor Product

- Introduction
- Equiformer
  - Equivariant Features and Operations
  - Equivariant Graph Attention
  - Overall Architecture
- Experiments
- Conclusion

# Equiformer – Equivariant Graph Attention

- We propose equivariant graph attention, which:
  - improves the expressivity of attention used by original Transformers and
  - consists of tensor products, non-linear attention and non-linear messages.

- The feature sent from node  $s$  to node  $t$  is:

$$m_{ts} = a_{ts} \times v_{ts}$$

- $a_{ts}$  : attention weights (scalars)
- $v_{ts}$  : value vectors (irreps features or geometric tensors)
- Both are obtained with tensor products and non-linear functions.

- Introduction
- Equiformer
  - Equivariant Features and Operations
  - Equivariant Graph Attention
  - Overall Architecture
- Experiments
- Conclusion

# Equiformer – Overall Architecture

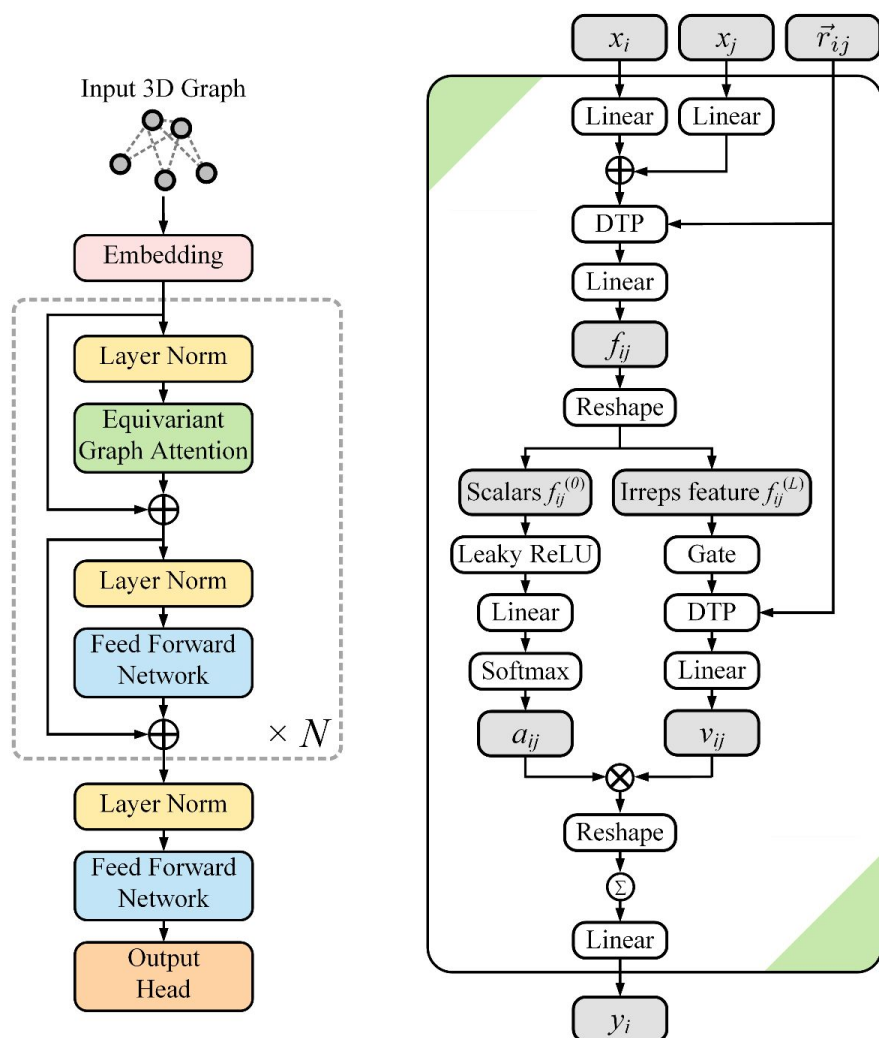

(a) Equiformer Architecture

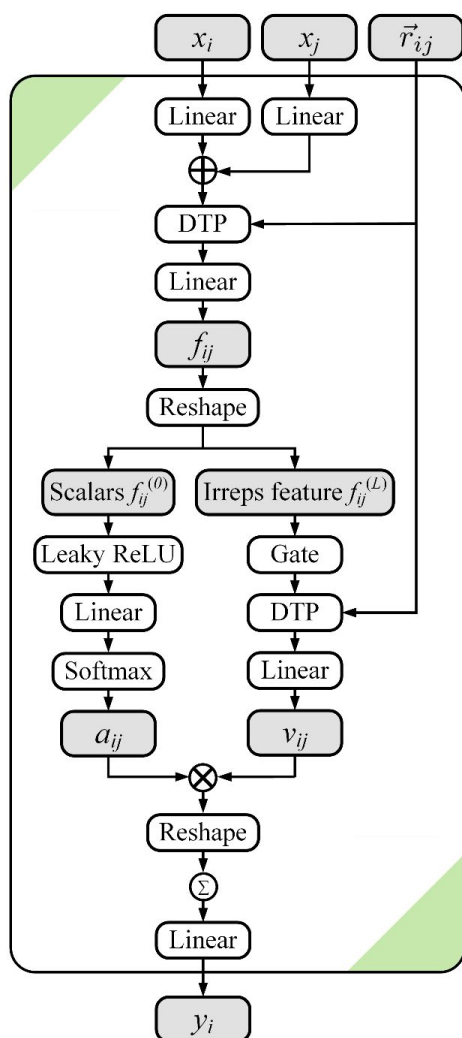

(b) Equivariant Graph Attention

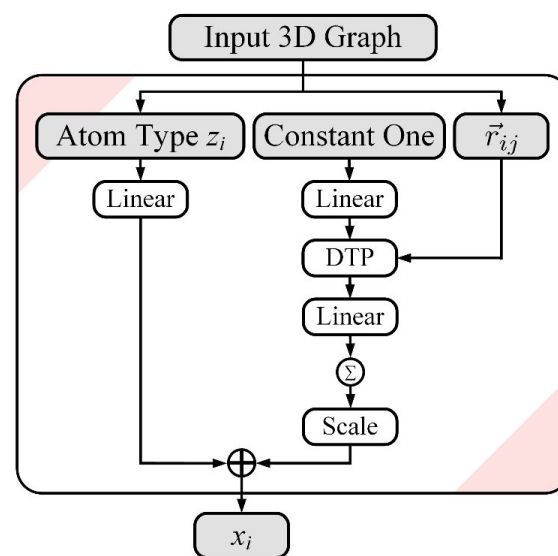

(c) Embedding (Atom + Edge-Degree)

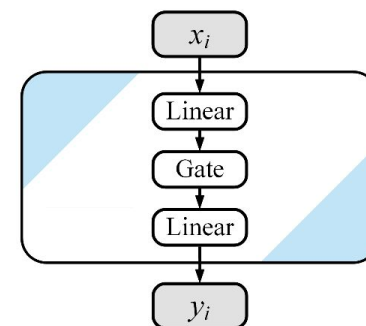

(d) Feed Forward Network

- Introduction
- Equiformer
  - Equivariant Features and Operations
  - Equivariant Graph Attention
  - Overall Architecture
- **Experiments**
- Conclusion

# Experiments – QM9

- The task is to predict quantum properties of small molecules given their atom types and 3D positions.
- Equiformer achieves overall better results compared to previous equivariant Transformers and other equivariant message passing networks and invariant message passing networks.

| Methods                        | Task Units | $\alpha$<br>$a_0^3$ | $\Delta\varepsilon$<br>meV | $\varepsilon_{\text{HOMO}}$<br>meV | $\varepsilon_{\text{LUMO}}$<br>meV | $\mu$<br>D  | $C_v$<br>cal/mol K | $G$<br>meV  | $H$<br>meV  | $R^2$<br>$a_0^2$ | $U$<br>meV  | $U_0$<br>meV | ZPVE<br>meV |
|--------------------------------|------------|---------------------|----------------------------|------------------------------------|------------------------------------|-------------|--------------------|-------------|-------------|------------------|-------------|--------------|-------------|
| SE(3)-Transformer <sup>†</sup> |            | .142                | 53                         | 35                                 | 33                                 | .051        | .054               | -           | -           | -                | -           | -            | -           |
| PaiNN                          |            | .045                | 46                         | 28                                 | 20                                 | .012        | .024               | <b>7.35</b> | <b>5.98</b> | .066             | <b>5.83</b> | <b>5.85</b>  | 1.28        |
| TorchMD-NET                    |            | .059                | 36                         | 20                                 | 18                                 | <b>.011</b> | .026               | 7.62        | 6.16        | <b>.033</b>      | 6.38        | 6.15         | 1.84        |
| SphereNet                      |            | .046                | 32                         | 23                                 | 18                                 | .026        | <b>.021</b>        | 8           | 6           | .292             | 7           | 6            | <b>1.12</b> |
| SEGNN <sup>†</sup>             |            | .060                | 42                         | 24                                 | 21                                 | .023        | .031               | 15          | 16          | .660             | 13          | 15           | 1.62        |
| EQGAT                          |            | .053                | 32                         | 20                                 | 16                                 | <b>.011</b> | .024               | 23          | 24          | .382             | 25          | 25           | 2.00        |
| Equiformer                     |            | .046                | <b>30</b>                  | <b>15</b>                          | <b>14</b>                          | <b>.011</b> | .023               | 7.63        | 6.63        | .251             | 6.74        | 6.59         | 1.26        |

Mean absolute error results on QM9 testing set. † denotes using different data partitions.

# Experiments – MD17

- The dataset consists of molecular dynamics simulations of small organic molecules.
- The task is to predict their energy and forces given atom types and 3D positions.
- Equiformer achieves overall better results compared to previous equivariant Transformers and other equivariant message passing networks and invariant message passing networks.

| Methods                      | Aspirin    |            | Benzene |        | Ethanol    |            | Malonaldehyde |            | Naphthalene |            | Salicylic acid |            | Toluene    |            | Uracil     |            |
|------------------------------|------------|------------|---------|--------|------------|------------|---------------|------------|-------------|------------|----------------|------------|------------|------------|------------|------------|
|                              | energy     | forces     | energy  | forces | energy     | forces     | energy        | forces     | energy      | forces     | energy         | forces     | energy     | forces     | energy     | forces     |
| DimeNet                      | 8.8        | 21.6       | 3.4     | 8.1    | 2.8        | 10.0       | 4.5           | 16.6       | 5.3         | 9.3        | 5.8            | 16.2       | 4.4        | 9.4        | 5.0        | 13.1       |
| PaiNN                        | 6.9        | 14.7       | -       | -      | 2.7        | 9.7        | 3.9           | 13.8       | 5.0         | 3.3        | 4.9            | 8.5        | 4.1        | 4.1        | 4.5        | 6.0        |
| TorchMD-NET                  | <b>5.3</b> | 11.0       | 2.5     | 8.5    | 2.3        | 4.7        | 3.3           | 7.3        | <b>3.7</b>  | 2.6        | <b>4.0</b>     | 5.6        | <b>3.2</b> | 2.9        | <b>4.1</b> | 4.1        |
| NequIP ( $L_{max} = 3$ )     | 5.7        | 8.0        | -       | -      | <b>2.2</b> | 3.1        | 3.3           | 5.6        | 4.9         | <b>1.7</b> | 4.6            | <b>3.9</b> | 4.0        | <b>2.0</b> | 4.5        | <b>3.3</b> |
| Equiformer ( $L_{max} = 3$ ) | <b>5.3</b> | <b>6.6</b> | 2.5     | 8.1    | <b>2.2</b> | <b>2.9</b> | <b>3.2</b>    | <b>5.4</b> | 4.4         | 2.0        | 4.3            | <b>3.9</b> | 3.7        | 2.1        | 4.3        | 3.4        |

Mean absolute error results on MD17 testing set.



# Experiments – OC20

- The task of IS2RE (initial structure to relaxed energy) is to predict the energy of a relaxed structure given an initial structure.
- With the same setting, Equiformer improves upon previous works.

| Methods    | Energy MAE (eV) ↓ |               |               |               |               |
|------------|-------------------|---------------|---------------|---------------|---------------|
|            | ID                | OOD Ads       | OOD Cat       | OOD Both      | Average       |
| DimeNet++  | 0.5621            | 0.7252        | 0.5756        | 0.6613        | 0.6311        |
| PaiNN      | 0.575             | 0.783         | 0.604         | 0.743         | 0.6763        |
| SpinConv   | 0.5583            | 0.7230        | 0.5687        | 0.6738        | 0.6310        |
| SphereNet  | 0.5625            | 0.7033        | 0.5708        | 0.6378        | 0.6186        |
| SEGNN      | 0.5327            | 0.6921        | 0.5369        | 0.6790        | 0.6101        |
| Equiformer | <b>0.5037</b>     | <b>0.6881</b> | <b>0.5213</b> | <b>0.6301</b> | <b>0.5858</b> |

**Results on OC20 IS2RE testing set.**

# Experiments – OC20

- When trained with additional relaxed structure data, Equiformer improves upon GNS + Noisy Nodes and Graphormer.
- Equiformer has 2.3× to 15.5× less training time.

| Methods                  | Energy MAE (eV) ↓ |               |               |               |               | Training time<br>(GPU-days) |
|--------------------------|-------------------|---------------|---------------|---------------|---------------|-----------------------------|
|                          | ID                | OOD Ads       | OOD Cat       | OOD Both      | Average       |                             |
| GNS + Noisy Nodes        | 0.4219            | 0.5678        | 0.4366        | <b>0.4651</b> | 0.4728        | 56 (TPU)                    |
| Graphormer <sup>†</sup>  | <b>0.3976</b>     | 0.5719        | <b>0.4166</b> | 0.5029        | 0.4722        | 372 (A100)                  |
| Equiformer + Noisy Nodes | 0.4171            | <b>0.5479</b> | 0.4248        | 0.4741        | <b>0.4660</b> | <b>24</b> (A6000)           |

**Results on OC20 IS2RE testing set when IS2RS is adopted during training.** † denotes using ensemble of models trained on both IS2RE training and validation sets.

- Introduction
- Equiformer
  - Equivariant Features and Operations
  - Equivariant Graph Attention
  - Overall Architecture
- Experiments
- Conclusion

# Conclusion

- Equiformer demonstrates the possibility of generalizing Transformers to the domain of 3D atomistic systems.
- Equivariant graph attention improves upon typical self-attention in original Transformers.
- The encouraging result leads to the question of whether other approaches developed in other domains can generalize to problems related to 3D atomistic systems.
- Official PyTorch implementation:  
<https://github.com/atomicarchitects/equiformer>

Thank you for your **Attention!**

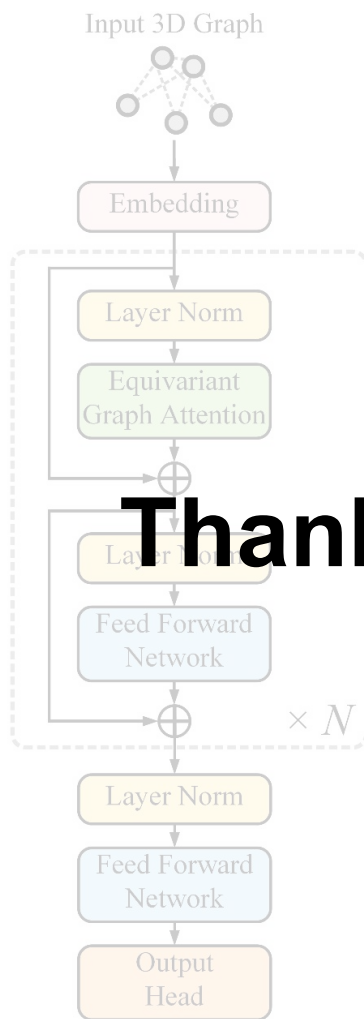

(a) Equiformer Architecture

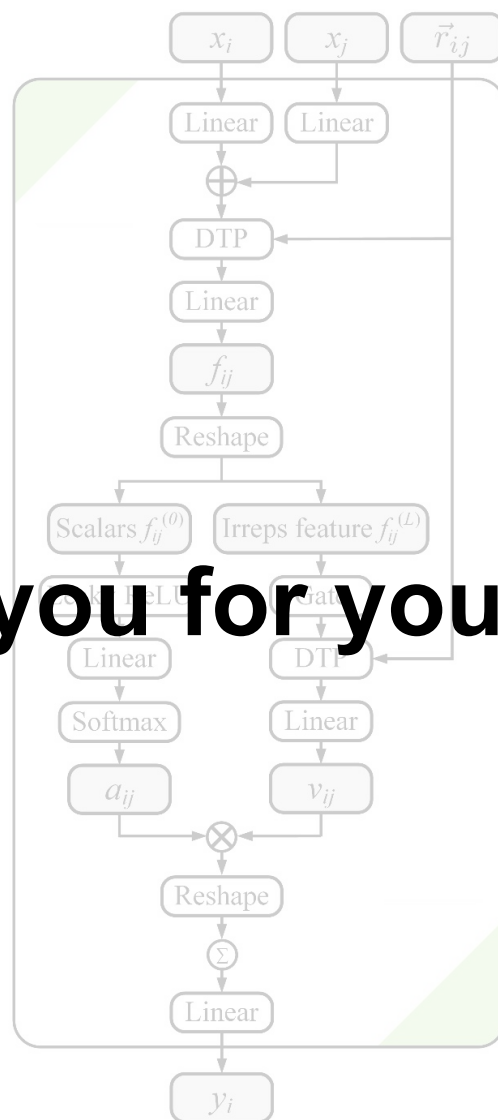

(b) Equivariant Graph Attention

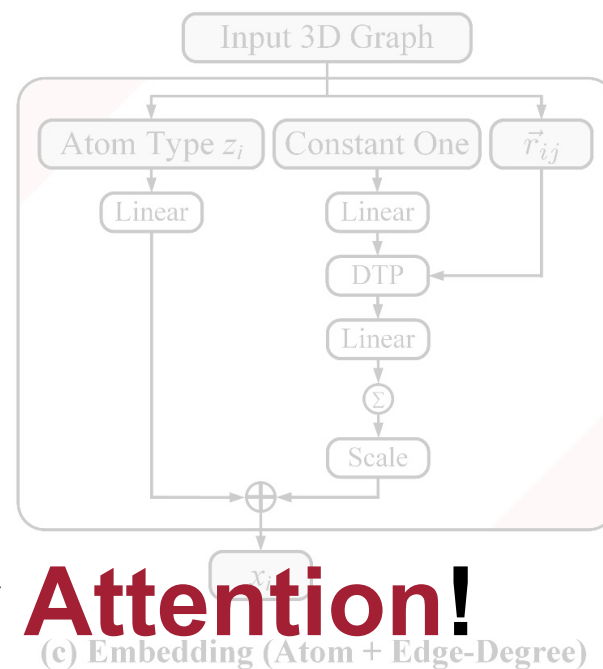

(c) Embedding (Atom + Edge-Degree)

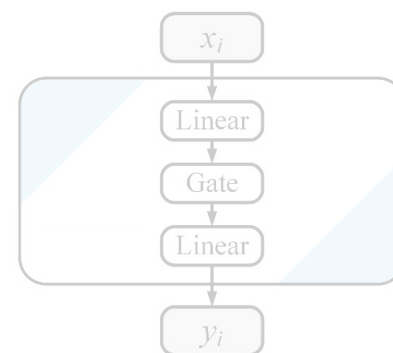

(d) Feed Forward Network

# Backup Slides

## 23 Experiments – Ablation Study

- Non-linear attention (MLP attention) improves upon linear attention (dot product attention).

| Index | Methods                       |                  |                          | Task Unit | $\alpha$<br>$a_0^3$ | $\Delta\varepsilon$<br>meV | $\varepsilon_{\text{HOMO}}$<br>meV | $\varepsilon_{\text{LUMO}}$<br>meV | $\mu$<br>D | $C_v$<br>cal/mol K | Training time<br>(minutes/epoch) | Number of<br>parameters |
|-------|-------------------------------|------------------|--------------------------|-----------|---------------------|----------------------------|------------------------------------|------------------------------------|------------|--------------------|----------------------------------|-------------------------|
|       | Non-linear<br>message passing | MLP<br>attention | Dot product<br>attention |           |                     |                            |                                    |                                    |            |                    |                                  |                         |
| 1     | ✓                             | ✓                |                          |           | .046                | 30                         | 15                                 | 14                                 | .011       | .023               | 12.1                             | 3.53M                   |
| 2     |                               | ✓                |                          |           | .051                | 32                         | 16                                 | 16                                 | .013       | .025               | 7.2                              | 3.01M                   |
| 3     |                               |                  | ✓                        |           | .053                | 32                         | 17                                 | 16                                 | .013       | .025               | 7.8                              | 3.35M                   |

**Ablation study results on QM9.**

| Index | Methods                       |                  |                          | Energy MAE (eV) ↓ |         |         |          |         | Training time<br>(minutes/epoch) | Number of<br>parameters |
|-------|-------------------------------|------------------|--------------------------|-------------------|---------|---------|----------|---------|----------------------------------|-------------------------|
|       | Non-linear<br>message passing | MLP<br>attention | Dot product<br>attention | ID                | OOD Ads | OOD Cat | OOD Both | Average |                                  |                         |
| 1     | ✓                             | ✓                |                          | 0.5088            | 0.6271  | 0.5051  | 0.5545   | 0.5489  | 130.8                            | 9.12M                   |
| 2     |                               | ✓                |                          | 0.5168            | 0.6308  | 0.5088  | 0.5657   | 0.5555  | 91.2                             | 7.84M                   |
| 3     |                               |                  | ✓                        | 0.5386            | 0.6382  | 0.5297  | 0.5692   | 0.5689  | 99.3                             | 8.72M                   |

**Ablation study results on OC20 IS2RE validation set.**

## 24 Experiments – Ablation Study

- Non-linear messages improves upon linear messages.

| Index | Methods                       |                  |                          | Task Unit | $\alpha$<br>$a_0^3$ | $\Delta\varepsilon$<br>meV | $\varepsilon_{\text{HOMO}}$<br>meV | $\varepsilon_{\text{LUMO}}$<br>meV | $\mu$<br>D | $C_v$<br>cal/mol K | Training time<br>(minutes/epoch) | Number of<br>parameters |
|-------|-------------------------------|------------------|--------------------------|-----------|---------------------|----------------------------|------------------------------------|------------------------------------|------------|--------------------|----------------------------------|-------------------------|
|       | Non-linear<br>message passing | MLP<br>attention | Dot product<br>attention |           |                     |                            |                                    |                                    |            |                    |                                  |                         |
| 1     | ✓                             | ✓                |                          |           | .046                | 30                         | 15                                 | 14                                 | .011       | .023               | 12.1                             | 3.53M                   |
| 2     |                               | ✓                |                          |           | .051                | 32                         | 16                                 | 16                                 | .013       | .025               | 7.2                              | 3.01M                   |
| 3     |                               |                  | ✓                        |           | .053                | 32                         | 17                                 | 16                                 | .013       | .025               | 7.8                              | 3.35M                   |

**Ablation study results on QM9.**

| Index | Methods                       |                  |                          | Energy MAE (eV) ↓ |         |         |          |         | Training time<br>(minutes/epoch) | Number of<br>parameters |
|-------|-------------------------------|------------------|--------------------------|-------------------|---------|---------|----------|---------|----------------------------------|-------------------------|
|       | Non-linear<br>message passing | MLP<br>attention | Dot product<br>attention | ID                | OOD Ads | OOD Cat | OOD Both | Average |                                  |                         |
| 1     | ✓                             | ✓                |                          | 0.5088            | 0.6271  | 0.5051  | 0.5545   | 0.5489  | 130.8                            | 9.12M                   |
| 2     |                               | ✓                |                          | 0.5168            | 0.6308  | 0.5088  | 0.5657   | 0.5555  | 91.2                             | 7.84M                   |
| 3     |                               |                  | ✓                        | 0.5386            | 0.6382  | 0.5297  | 0.5692   | 0.5689  | 99.3                             | 8.72M                   |

**Ablation study results on OC20 IS2RE validation set.**



# Steps of Equivariant Graph Attention

- Given nodes  $t$  and  $s$  with features  $x_t$  and  $x_s$ , we combine the features with linear layers and tensor products to obtain  $f_{ts}$ .

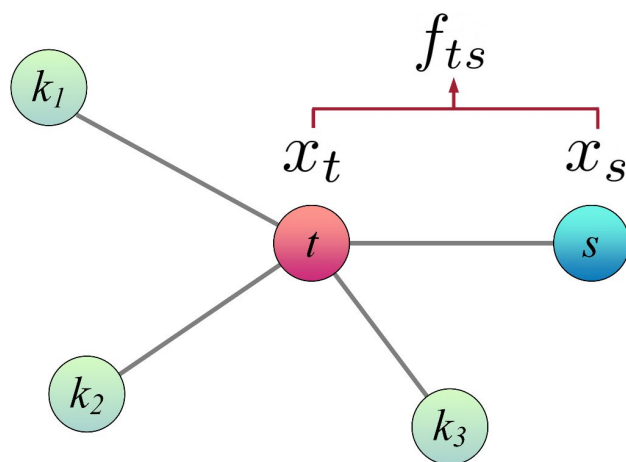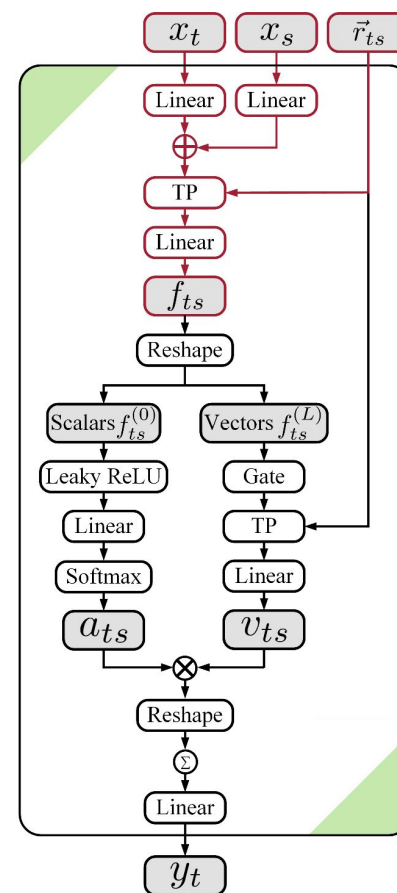

# Steps of Equivariant Graph Attention

- We split feature  $f_{ts}$  into scalar features  $f_{ts}^{(0)}$  and irreps features  $f_{ts}^{(L)}$  (scalars + vectors of higher degrees).

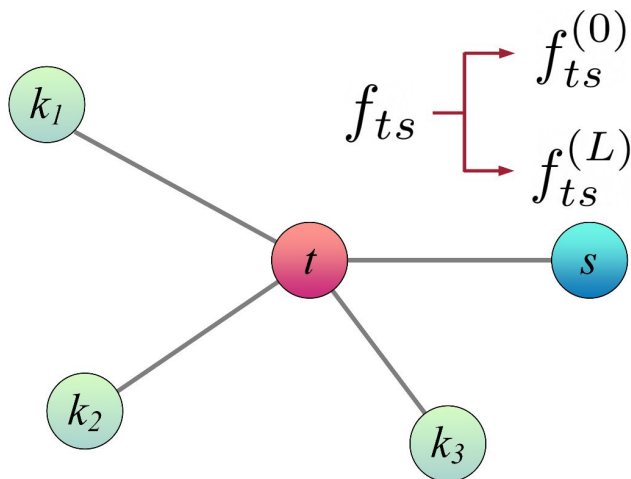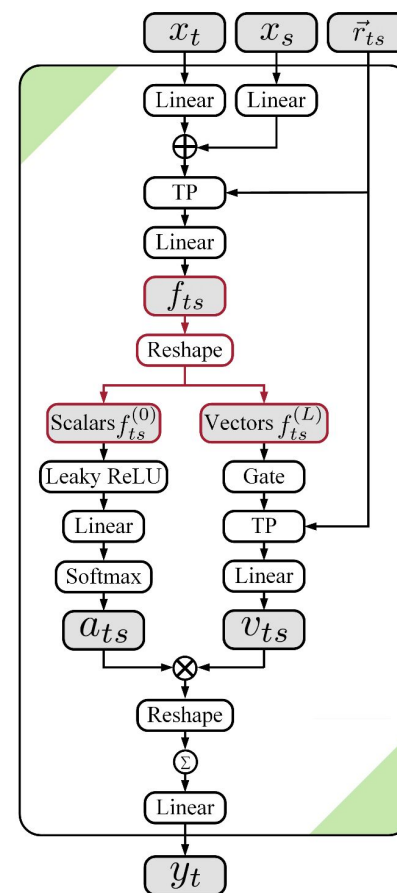

# Steps of Equivariant Graph Attention – Non-linear Attention

- Given scalar features  $f_{tk}^{(0)}$  associated with neighbors of node  $t$ ,
  - 1) project each feature into a scalar with **activation** and a linear layer.
  - 2) softmax over all scalars to obtain attention weights  $a_{ts}$ .

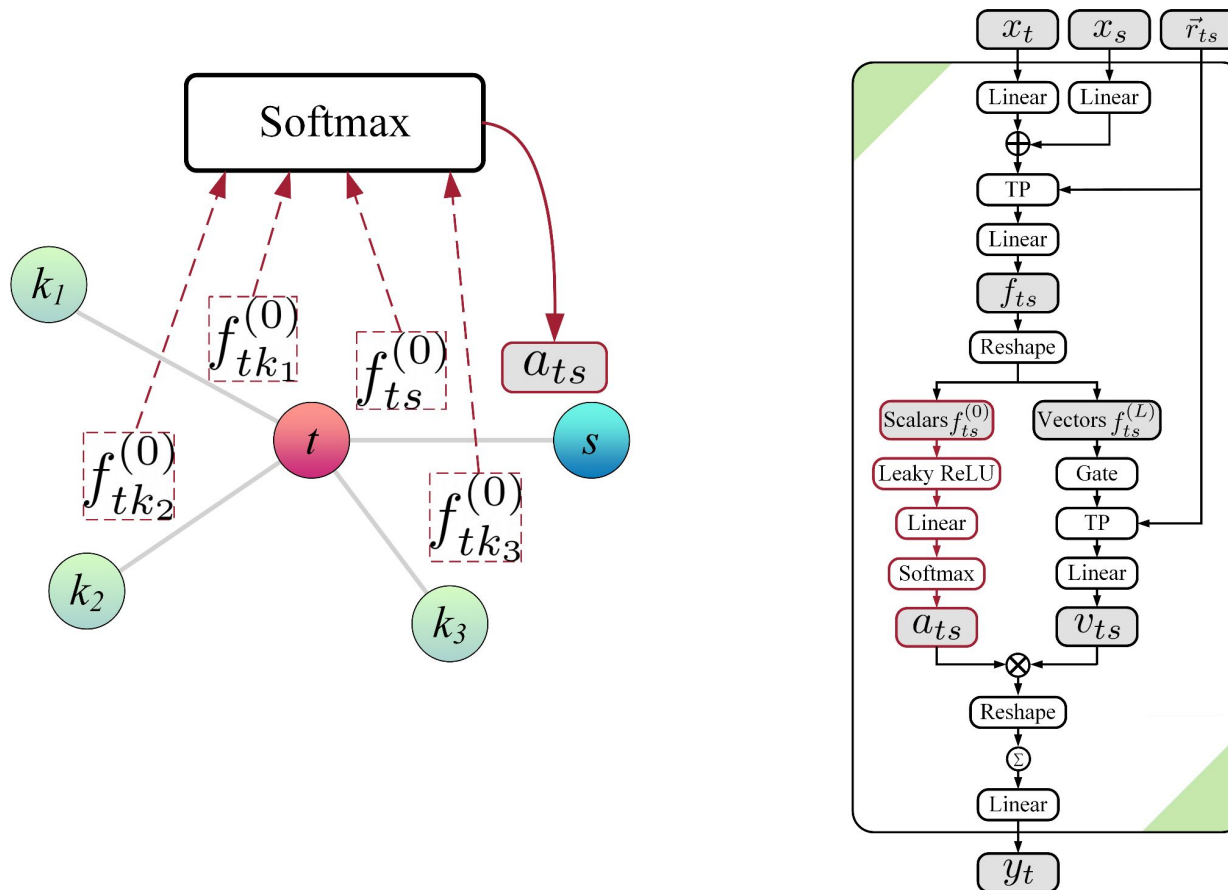

# Steps of Equivariant Graph Attention – Non-linear Messages

- We transform irreps features  $f_{ts}^{(L)}$  into value vectors  $v_{ts}$  with gate activation and tensor product.
- Finally, we multiply non-linear value vectors with non-linear attention weights.

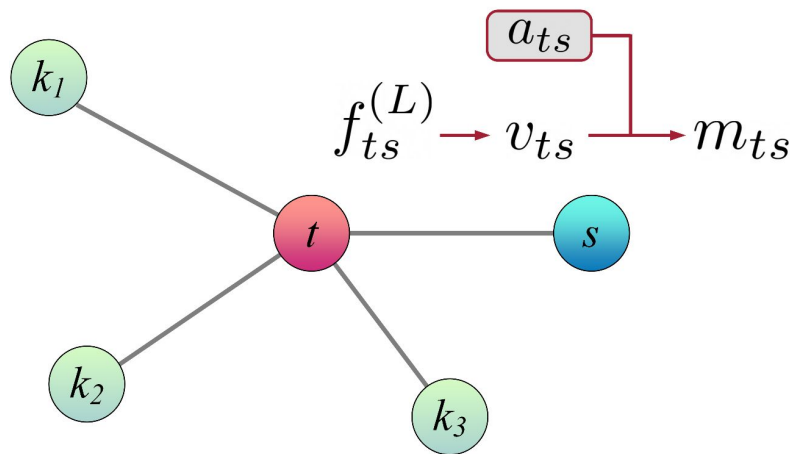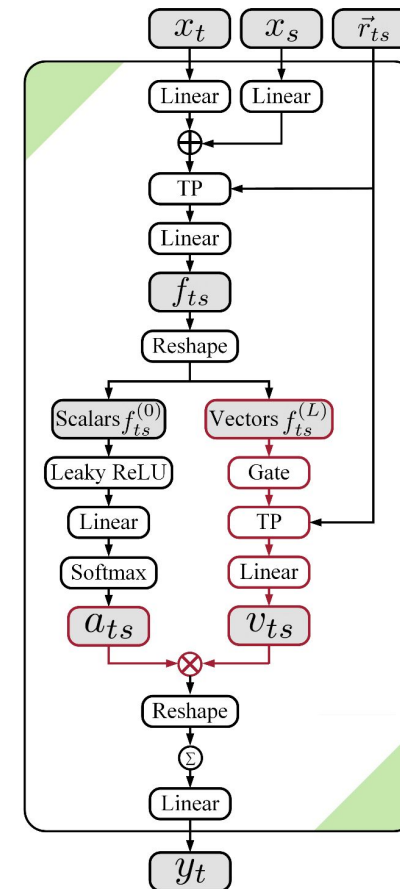

Supplement: supplementary_material [file attachment]
